# Supplementary material
Source: Research Square preprint supplement (doi:10.21203/rs.3.rs-10270643/v1)
Supplement: Supplementary file 1 [file 7479972ec3bca361aaefb205.docx]

**Supplementary Table 1. Clinical Impact of Biopsies from Macroscopically Normal Mucosa (Patient-Level Analysis)**

| **Clinical Impact** | **Cause** | **Site** | **n** | **%** |
| --- | --- | --- | --- | --- |
| **Biopsy altered management (n = 60)** | Gastric atrophy | Corpus (2), Antrum (1) | 3 | 0.5 |
| Eosinophilic esophagitis | Esophagus | 6 | 1.0 |
| Foveolar cell metaplasia | Duodenum | 3 | 0.5 |
| Gastritis (treatment initiated based on histology) | Antrum | 2 | 0.3 |
| Giardia lamblia infection | Duodenum | 4 | 0.7 |
| Helicobacter pylori infection | Corpus (1), Antrum (25) | 26 | 4.5 |
| Intestinal metaplasia | Antrum (4), Bulb (2), Duodenum (2) | 8 | 1.4 |
| Esophagitis (treatment initiated based on histology) | Esophagus | 7 | 1.2 |
| Celiac disease | Duodenum | 1 | 0.2 |
| **Subtotal** |  |  | **60** | **10.4** |
| **Biopsy did not alter management (n = 517)** | Normal histopathology | — | 324 | 56.1 |
|  | Pathology detected but no treatment given | — | 184 | 31.9 |
|  | Treatment already initiated prior to biopsy result | — | 7 | 1.2 |
| **Subtotal** |  |  | **517** | **89.6** |
| **Total** |  |  | **577** | **100** |
